# Supplementary material for: Visualizing the Assembly Pathway of Nucleolar Pre-60S Ribosomes
Source: PubMed Central journal article supplement — Cell. 2017 Dec 14;171(7):1599–1610.e14. doi: 10.1016/j.cell.2017.11.039 (PMC5745149; doi:10.1016/j.cell.2017.11.039), 2017-12-14
Supplement: mmc1.pdf [file mmc1.pdf]

**Cell, Volume 171**

## **Supplemental Information**

### **Visualizing the Assembly Pathway**

#### **of Nucleolar Pre-60S Ribosomes**

**Lukas Kater, Matthias Thoms, Clara Barrio-Garcia, Jingdong Cheng, Sherif Ismail, Yasar Luqman Ahmed, Gert Bange, Dieter Kressler, Otto Berninghausen, Irmgard Sinning, Ed Hurt, and Roland Beckmann**

**Table S1. Plasmids used in this Study. Related to STAR methods plasmid constructs and yeast strains**

| <b>Name</b>                                           | <b>Relevant information</b>                                                                                       | <b>Source</b>          |
|-------------------------------------------------------|-------------------------------------------------------------------------------------------------------------------|------------------------|
| <b>pFA6a-TAP-klURA3</b>                               | CBP-TEVcleavage site-ProtA, <i>TADH1</i> , for genomic C-terminal tagging                                         | This study             |
| <b>pFA6a-Flag-natNT2</b>                              | Flag, <i>TCYC1</i> , for genomic C-terminal tagging                                                               | This study             |
| <b>pnatNT2 <i>P<sub>YTM1</sub></i> Flag</b>           | <i>P<sub>YTM1</sub></i> , Flag tag, for genomic N-terminal tagging                                                | This study             |
| <b>YCplac111-TAP-Flag-<i>YTM1</i></b>                 | CEN, <i>LEU2</i> , <i>PYTM1</i> , <i>TADH1</i> , N-term. ProtA-TEVcleavage site-CBP-Flag tag (Thoms et al., 2016) |                        |
| <b>YCplac111-TAP-Flag-<i>ytm1</i> ΔUBL</b>            | CEN, <i>LEU2</i> , <i>PYTM1</i> , <i>TADH1</i> , N-term. ProtA-TEVcleavage site-CBP-Flag tag                      | This study             |
| <b>YCplac111-TAP-Flag-<i>ytm1</i> E80A</b>            | CEN, <i>LEU2</i> , <i>PYTM1</i> , <i>TADH1</i> , N-term. ProtA-TEVcleavage site-CBP-Flag tag                      | This study             |
| <b>YCplac111-pA-TEV-(His)<sub>6</sub>-<i>RPF1</i></b> | CEN, <i>LEU2</i> , <i>PNOP53</i> , <i>TADH1</i> , N-term. ProtA-TEVcleavage site-(His) <sub>6</sub> tag           | This study             |
| <b>pET15b-<i>CtRrp1</i>-(His)<sub>6</sub> *</b>       | Amp <sup>r</sup> , T7 promoter, <i>lac</i> operator                                                               | (Bassler et al., 2017) |
| <b>pET15b-<i>Nsa1</i>-(His)<sub>6</sub> *</b>         | Amp <sup>r</sup> , T7 promoter, <i>lac</i> operator                                                               | This study             |

E.coli expression plasmids are marked with asterisk.

**Table S2. Yeast Strains used in this Study. Related to STAR methods plasmid constructs and yeast strains**

| Name                                 | Relevant genotype                                             | Source                       |
|--------------------------------------|---------------------------------------------------------------|------------------------------|
| <b>W303</b>                          | wild-type, MAT                                                | (Thomas and Rothstein, 1989) |
| <b>DS1-2b *</b>                      | wild-type                                                     | (Nissan et al., 2002)        |
| <b>NSA1-TAP Flag-YTM1 *</b>          | <i>NSA1-TAP::klURA3, P<sub>Flag-Ytm1</sub>-YTM1::natNT2</i>   | This study                   |
| <b>RIX1-TAP RPF2-Flag *</b>          | <i>RIX1-TAP::TRP1, RPF2-Flag::natNT2</i>                      | This study                   |
| <b>BRX1-HTpA</b>                     | <i>BRX1-HTpA::His3MX4</i>                                     | This study                   |
| <b>pA-TEV-(HIS)<sub>6</sub>-RPF1</b> | <i>rpf1::HIS3MX4, YCplac111 pA-TEV-(HIS)<sub>6</sub>-RPF1</i> | This study                   |

Strains marked with an asterisk were derived from DS1-2b (Nissan et al., 2002)

**Table S3: Data collection and refinement statistics for ScNsa1. Related to STAR methods protein production, crystallization and structure determination**

---

|                                   |                         |
|-----------------------------------|-------------------------|
| <b>Data collection</b>            |                         |
| Wavelength (Å)                    | 1.0                     |
| Space group                       | P 21 21 21              |
| Cell dimensions                   |                         |
| a, b, c (Å)                       | 54.72 81.1 87.57        |
| $\alpha$ , $\beta$ , $\gamma$ (°) | 90, 90, 90              |
| Resolution (Å)                    | 59.5 - 2.4 (2.49 - 2.4) |
| $R_{\text{merge}}$                | 0.04384(0.1126)         |
| $I/\sigma(I)$                     | 34.78 (14.02)           |
| Reflections total                 | 111874 (8692)           |
| Reflections unique                | 15750 (1543)            |
| Multiplicity                      | 7.1 (5.6)               |
| <b>Refinement</b>                 |                         |
| $R_{\text{work}}$                 | 0.1592 (0.1724)         |
| $R_{\text{free}}$                 | 0.2027 (0.2799)         |
| No. atoms                         |                         |
| Protein                           | 2955                    |
| Water                             | 194                     |
| B-factors                         |                         |
| Protein                           | 20.70                   |
| Water                             | 22.80                   |
| R.m.s deviations                  |                         |
| Bond lengths (Å)                  | 0.011                   |
| Bond angles (°)                   | 1.41                    |
| Ramachandran plot                 |                         |
| Most favoured (%)                 | 97                      |
| Disallowed                        | 0.55                    |

---

**Table S4: Data collection and refinement statistics for CtRrp1. Related to STAR methods protein production, crystallization and structure determination**

|                          | Native 1 (C2)              | Native 2 (P6 <sub>3</sub> 22) | Pt-derivative            |
|--------------------------|----------------------------|-------------------------------|--------------------------|
| <b>Data collection</b>   |                            |                               |                          |
| Wavelength (Å)           | 1.03323                    |                               | 1.07156                  |
| Space group              | C2                         | P6 <sub>3</sub> 22            | P6 <sub>3</sub> 22       |
| Cell dimensions          |                            |                               |                          |
| a, b, c (Å)              | 131.72, 74.67, 68.79       | 124.26, 124.26, 124.79        | 214.75, 214.75, 125.95   |
| α, β, γ (°)              | 90, 90.52, 90              | 90, 90, 120                   | 90, 90, 120              |
| Resolution (Å)           | 47.36 – 2.65 (2.74 – 2.65) | 49.22 – 2.24 (2.32 – 2.24)    | 47.72 – 3.3 (3.41 – 3.3) |
| <i>R</i> <sub>pim</sub>  | 0.093 (0.3138)             | 0.021 (0.3559)                | 0.114 (1.935)            |
| /σ( <i>I</i> )           | 6.88 (1.67)                | 24.62 (2.16)                  | 12.61 (1.18)             |
| Reflections total        | 219854 (17947)             | 1632833 (166862)              | 1010978 (96718)          |
| Reflections unique       | 19400 (1827)               | 80956 (7988)                  | 26210 (2572)             |
| Multiplicity             | 11.3 (9.8)                 | 20.2 (20.9)                   | 38.6 (37.6)              |
| <b>Refinement</b>        |                            |                               |                          |
| <i>R</i> <sub>work</sub> | 0.2052 (0.2967)            | 0.1836 (0.2855)               |                          |
| <i>R</i> <sub>free</sub> | 0.2342 (0.3679)            | 0.2090 (0.2918)               |                          |
| No. atoms                |                            |                               |                          |
| Protein                  | 3746                       | 3723                          |                          |
| Water                    | 117                        | 212                           |                          |
| B-factors                |                            |                               |                          |
| Protein                  | 40.42                      | 69.65                         |                          |
| Water                    | 38.82                      | 68.03                         |                          |
| R.m.s deviations         |                            |                               |                          |
| Bond lengths (Å)         | 0.003                      | 0.003                         |                          |
| Bond angles (°)          | 0.52                       | 0.68                          |                          |
| Ramachandran plot        |                            |                               |                          |
| Most favoured (%)        | 98.66                      | 98.66                         |                          |
| Disallowed               | 0.45                       | 0.45                          |                          |

**Table S5. Cryo-EM model and refinement statistics. Related to STAR methods model building and refinements**

|                                                 | State C   | State E   |
|-------------------------------------------------|-----------|-----------|
| <b>Data collection</b>                          |           |           |
| Particles                                       | 157,184   | 115529    |
| Pixel size (Å)                                  | 1.084     | 1.084     |
| Defocus range (µm)                              | 0.9 – 3.5 | 0.9 – 3.5 |
| Voltage (kV)                                    | 300       | 300       |
| Electron dose (e <sup>-</sup> Å <sup>-2</sup> ) | 27        | 27        |
| <b>Model Refinement</b>                         |           |           |
| <b>Model composition</b>                        |           |           |
| Non-hydrogen atoms                              | 88243     | 135041    |
| Protein residues                                | 5800      | 9709      |
| RNA bases                                       | 1943      | 2680      |
| <b>Refinement</b>                               |           |           |
| Resolution for refinement (Å)                   | 3.6       | 3.3       |
| Map sharpening B-factor (Å <sup>2</sup> )       | -144      | -123      |
| Average B-factor (Å <sup>2</sup> )              | 174.8     | 101.1     |
| FSC <sub>average</sub>                          | 0.845     | 0.805     |
| <b>R.m.s. deviations</b>                        |           |           |
| Bond lengths (Å)                                | 0.0129    | 0.0068    |
| Bond angles (°)                                 | 1.35      | 1.17      |
| <b>Validation &amp; Statistics</b>              |           |           |
| <b>Validation</b>                               |           |           |
| Molprobit score                                 | 2.86      | 2.4       |
| Clashscore, all atoms                           | 8.08      | 6.53      |
| Good rotameres (%)                              | 89.06     | 95.29     |
| <b>Ramachandran Plot</b>                        |           |           |
| Favored (%)                                     | 86.66     | 90.64     |
| Outliers (%)                                    | 3.56      | 1.33      |
| <b>Validation (RNA)</b>                         |           |           |
| Correct sugar puckers (%)                       | 97.1      | 97.1      |
| Good backbone conformations (%)                 | 72.1      | 66.7      |
